# Supplementary material for: Be Kind to Your Behind: A Systematic Review of the Habitual Use of Bidets in Benign Perianal Disease
Source: Evid Based Complement Alternat Med. 2022 May 31;2022:1633965. doi: 10.1155/2022/1633965 (PMC9173983; doi:10.1155/2022/1633965)
Supplement: Supplementary Materials — Appendix 1: JBI critical appraisal tool. This is a copy of the Joanna Briggs Institute Critical Appraisal Evaluation form used to critically appraise research studies that are included in a systematic review. The evaluation tool is published by the institute and validated in the role of critically appraising articles for systematic reviews [12]. We used this tool to evaluate the studies in this systematic review. Appendix 2: database search strategy. This document describes the search strategy used to obtain the findings from both PubMed and MEDLINE to obtain the articles we found for the systematic review. Appendix 3: completed PRISMA checklist. The Preferred Reporting Items for Systematic Reviews and Meta-analyses (PRISMA) is a validated checklist used to improve transparency in systematic reviews [10]. [file 1633965.f1.zip]

Archive with 3 entries (3 files):
- 163396.f1/Appendix 1. JBI Critical Appraisal Tool.docx
- 163396.f1/Appendix 2.  Database search strategy .docx
- 163396.f1/Appendix 3. Completed PRISMA checklist.docx
